## Detection of cross-frequency coupling between brain areas: an extension of phase-linearity measurement.

Pierpaolo Sorrentino<sup>a,b,c,d,e</sup>, Michele Ambrosanio<sup>a</sup>, Rosaria Rucco<sup>a,d,f</sup>, Joana Cabral<sup>g,h</sup>, Leonardo L. Gollo<sup>i,b</sup>, Michael Breakspear<sup>j,b</sup>, Fabio Baselice<sup>a,\*</sup>

<sup>a</sup>*Department of Engineering, University of Naples Parthenope, Italy*

<sup>b</sup>*QIMR Berghofer Medical Research Institute, Brisbane, Australia*

<sup>c</sup>*Systems Neuroscience Institute, Marseille, France*

<sup>d</sup>*Hermitage Capodimonte Hospital, via Cupa delle Tozzole 2, 80131 Naples, Italy*

<sup>e</sup>*Institute of Applied Sciences and Intelligent Systems, National Research Council, Pozzuoli, Italy*

<sup>f</sup>*Department of Motor Sciences and Wellness, University of Naples Parthenope, Italy*

<sup>g</sup>*Life and Health Sciences Research Institute (ICVS), University of Minho, Braga, Portugal*

<sup>h</sup>*Department of Psychiatry, University of Oxford, UK*

<sup>i</sup>*Turner Institute for Brain and Mental Health, School of Psychological Sciences, Monash University, Australia*

<sup>j</sup>*Hunter Medical Research Institute, Newcastle, Australia*

---

### Abstract

The current paper proposes a method to estimate phase to phase cross-frequency coupling between brain areas, applied to broadband signals, without any a priori hypothesis about the frequency of the synchronized components. N:m synchronization is the only form of cross-frequency synchronization that allows the exchange of information at the time resolution of the faster signal, hence likely to play a fundamental role in large-scale coordination of brain activity. The proposed method, named cross-frequency phase linearity measurement (CF-PLM), builds and expands upon the phase linearity measurement, an iso-frequency connectivity metrics previously published by our group. The main idea lies in using the shape of the interferometric spectrum of the two analyzed signals in order to estimate the strength of cross-frequency coupling. Here, we demonstrate that the CF-PLM successfully retrieves the (different) frequencies of the original broad-band signals involved in the connectivity process. Furthermore, if the broadband signal has some frequency components that are synchronized

---

\*Corresponding author

in iso-frequency and some others that are synchronized in cross-frequency, our methodology can successfully disentangle them and describe the behaviour of each frequency component separately. We first provide a theoretical explanation of the metrics. Then, we test the proposed metric on simulated data from coupled oscillators synchronized in iso- and cross-frequency (using both Rössler and Kuramoto oscillator models), and subsequently apply it on real data from brain activity, using source-reconstructed Magnetoencephalography (MEG) data. In the synthetic data, our results show reliable estimates even in the presence of noise and limited sample sizes. In the real signals, components synchronized in cross-frequency are retrieved, together with their oscillation frequencies. All in all, our method is useful to estimate n:m synchronization, based solely on the phase of the signals (independently of the amplitude), and no a-priori hypothesis is available about the expected frequencies. Our method can be exploited to more accurately describe patterns of cross-frequency synchronization and determine the central frequencies involved in the coupling.

*Keywords:* cross-frequency synchronization, phase linearity measurement, magnetoencephalography, electroencephalography, Kuramoto oscillators, Rössler oscillators.

---

## 1. Introduction

Brain areas need to constantly transfer information among themselves to put in place complex behavioural responses to the environment [1]. Functional connectivity is defined as the presence of statistical dependencies between the time-series representing the activity of brain regions [2, 3]. A variety of mechanisms through which this communication occurs are summarized in [4], involving only the phase [5] or also amplitude [6]. Each of these phenomena would underlie a specific neuro-physiological mechanism (for a review, see [7]). In the literature, a wide number of metrics have been proposed to detect each of these kinds of communication [8, 9]. Furthermore, communication between brain areas can occur either in iso-frequency or in cross-frequency. Cross-frequency coupling

(CFC) is the interaction occurring between neuronal populations operating at different frequencies. It has been postulated that this form of synchronization could represent a suitable option to allow large-scale synchronizations across distant areas in the brain [10, 11], yielding the integration of distributed information [12]. Moreover, definite (both frequency and spatial) patterns of CFC have been shown to be the neuro-physiological substrate underlying the recruitment of areas needed for the execution of tasks such as specific kinds of learning [13, 14, 15], segregation of interfering inputs [16], perception [17, 18], encoding of reward [19] or sensory processing [20]. In human brain activity, two main forms of cross-frequency coupling have been described so far. Firstly, the phase of slow oscillations can modulate the amplitude of faster activity [21, 22]. Furthermore, phase-phase synchronization has also been described, whereby the phases of “n” cycles of a signal are locked to “m” phase cycles of another signal [5]. This kind of cross-frequency communication, classically defined as n:m synchronization, has been observed previously in human brain data [23] and is the only mechanism capable of supporting CFC at high temporal resolution [24].

Several metrics have been developed to capture the presence of cross-frequency communication. For instance, phase-amplitude coupling [9] can successfully detect the presence of nested-synchronization, while metrics such as bicoherence [25] can detect cross-frequency, phase-phase coupling. However, bicoherence is not a pure phase-based metrics as its value depends also on the amplitude, preventing an unambiguous interpretation of the involved neuronal mechanisms [22]. The biphas-locking value, while purely based on the phase, also provides an estimate of the phase-amplitude coupling [26]. Metrics such as the phase-locking factor [22] detect pure phase to phase locking, but require an accurate a priori hypothesis about the frequencies involved in cross-frequency synchronization. The procedure proposed by Cohen [27], on the other hand, while not requiring any a priori hypothesis, focuses on phase-amplitude coupling.

Each approach has its own advantages and drawbacks and, when one is dealing with specific task-related data, given that a specific a priori hypothesis is available about the frequencies across which synchronization might be occurring,

the application of these metrics is effective [12]. However, when dealing with resting-state data, the situation changes because the signals contain several  
45 frequency bandwidths interacting with each other (possibly with more than one of the mentioned mechanisms) at once.

Restricting the analysis to phase-to-phase coupling, we have to consider that the bandwidth of the involved signals is so broad and complex to potentially allow the simultaneous occurrence of iso- and cross- frequency synchronizations at  
50 once [12, 6, 11, 28]. Disentangling these complex signals has proven to be elusive when one does not know a priori if, when and where cross-frequency is occurring within the brain. The aim of this paper is to develop a reliable estimation of phase-phase cross-frequency communication between the broadband signals of two brain regions, without a priori hypothesis on the frequencies at which  
55 such a synchronization might occur. To do this, we build and expand upon the phase linearity measurement (PLM), an iso-frequency phase-based connectivity metrics recently developed by our group [29].

One issue is related to the amount of potential combinations of frequencies and areas that one should test in order to look for CFC throughout the  
60 brain and throughout the frequency spectrum. Indeed, an attempt to identify the frequency at which cross-frequency synchronization is present from the data by selecting a number of combinations of possible frequencies has been done [30], using the level of synchronization across trials in order to statistically estimate where cross-frequency synchronization was present.

To this regard, a new method has been recently proposed, that does not require any a priori hypothesis and can estimate cross-frequency synchronization  
65 [31]. Such an approach estimates from the data the “candidate frequencies” where the CFC might be occurring. However, when performing this procedure, a maximization of the correlation between the signals is performed, hence reintroducing a form of dependency from the amplitude. The issue of the communication between different frequencies has also been addressed using a multiplex  
70 network approach [32]. The idea is that each layer of the multiplex network represents, at a specific frequency, the iso-frequency correlations between brain



areas. However, the cross-layers links are not estimated from the data. With  
75 the methodology proposed in this paper, we aim at providing a data-informed  
estimate of which brain areas and frequencies are involved in cross-frequency  
phase-to-phase coupling. The novelty of this work lies in the fact that no a  
priori information is required about the frequencies and the areas involved in  
the CFC. On the contrary, our technique allows to start from wide signal spec-  
80 trum and to detect if cross-frequency is occurring and, if so, to identify which  
frequency components are involved per each signal. Firstly, we provide a the-  
oretical description of the metric. Secondly, the metric is tested in a number  
of synthetic analytical models. We first used Rössler oscillators, which capture  
the non-linearities of the brain. Secondly, in order to simulate the simultaneous  
85 presence of iso and cross frequency synchronization, we implemented several  
Kuramoto oscillators, and introduced a lag between the generated signals. This  
procedure is known to produce the appearance of synchronization at a lower fre-  
quency bandwidth as compared to the original signals [33]. Hence, we tested the  
ability of the newly proposed methodology, namely cross-frequency phase linear-  
90 ity measurement (CF-PLM), to detect and disentangle both kinds of synchro-  
nism. Furthermore, we mixed the previously produced signals linearly, in order  
to obtain a case in which both iso-frequency and cross-frequency coupling are  
simultaneously present, and we tested if the newly proposed approach can dis-  
entangle such a situation. Finally, we tested the metrics on source-reconstructed  
95 MEG data (acquired by the MEG laboratory in Naples), and identified brain  
areas where cross-frequency is present that are spatially consistent across the  
tested subjects.

## 2. Methods

### 2.1. Definition of the interferometric signal

100 Let us define  $x(t)$  and  $y(t)$  as the time series related to two brain areas. By  
applying the Hilbert transform, their analytical expression is obtained:

$$\begin{aligned}A_x(t)e^{i\phi_x(t)} &= x(t) + \tilde{x}(t), \\A_y(t)e^{i\phi_y(t)} &= y(t) + \tilde{y}(t).\end{aligned}\tag{1}$$

where variables  $A$  and  $\phi$  represent the amplitude and the phase, respectively. According to this mathematical description, signals generated by brain areas can be modeled as complex phasors with time-varying amplitude and phase. According to [29], their phase-to-phase connectivity can be measured via a three steps procedure. Firstly, one extracts the normalized interferometric component of the two signals  $z(t)$  by computing:

$$z(t) = \frac{x(t)y'(t)}{|x(t)||y(t)|} = e^{i\Delta\phi(t)},\tag{2}$$

where the symbol  $'$  indicates the complex conjugate. Note that the complex interferometric function  $z(t)$  has an amplitude equal to 1 (thus it is independent of the amplitudes of the signals  $A_x(t)$  and  $A_y(t)$ ), and a phase term  $\Delta\phi(t) = \phi_x(t) - \phi_y(t) \in [-\pi, \pi[$ , which is the time-varying phase difference between the phases of  $x(t)$  and  $y(t)$ . It has been shown that one can exploit the behavior of the term  $\Delta\phi(t)$  in order to measure phase connectivity between signals. Hence, the frequency analysis of the function  $z(t)$  is carried out. Three different conditions could occur, as reported in Figure 1. In case of no synchrony between the sources, the interferometric phase values appear to be irregularly spread in the  $[-\pi, \pi[$  range (blue line in Figure 1). In case of phase coupling, the term  $\Delta\phi(t)$  will be characterized by a linear trend. That is, if the two sources have a similar oscillation frequency, the phase of the interferometric signal will be constant or slowly varying in time (red line in Figure 1) while in case of two sources oscillating at different frequencies, a slope will appear (yellow line in Figure 1). Once the complex signal  $z(t)$  has been computed, the second step for measuring the coupling consists in computing its power spectrum by means of the Fourier transform:

$$S_Z(f) = \left| \int_0^T z(t)e^{-i2\pi ft} dt \right|^2,\tag{3}$$

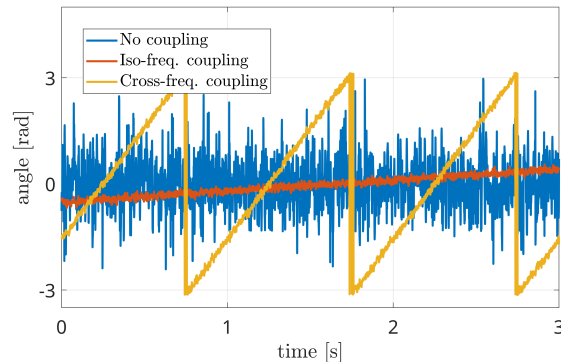

Figure 1: Interferometric phase signals in three different conditions: independent sources (blue line), coupled iso-frequency sources (red line) and coupled sources at different frequencies (yellow line).

125 where  $[0, T]$  is the observation period. In order to have a more reliable evaluation of the PSD function, we implemented the periodogram estimator with a rectangular window and confidence interval of 0.95 for the computation of  $S_Z(f)$  [34]. The shape of the power spectrum is strongly influenced by the strength of the coupling occurring between the two sources and by their central  
130 frequency, and hence it can be exploited to estimate them [29].

## 2.2. Phase Linearity Measurement

In Figure 2, the power spectra occurring in the different scenarios are represented. The blue line does not show any peak, in accordance with the absence of coupling between the sources. This means that the power spectrum of  $z(t)$  is almost flat (blue line of Figure 2) if its phase term  $\Delta\phi(t)$  irregularly spreads in the  $[-\pi, \pi]$  range (blue line of Figure 1).  
135

The red line shows an evident power peak around  $f = 0$ , which is due to a linear behavior of the interferometric phase  $\Delta\phi(t)$ , i.e.:

$$\Delta\phi(t) = \varphi_{xy} + \Delta ft, \quad (4)$$

where the term  $\Delta f$  is related to the different resonance frequencies of the two  
140 sources. In the case of iso-frequency coupling (IFC), such a term is relatively

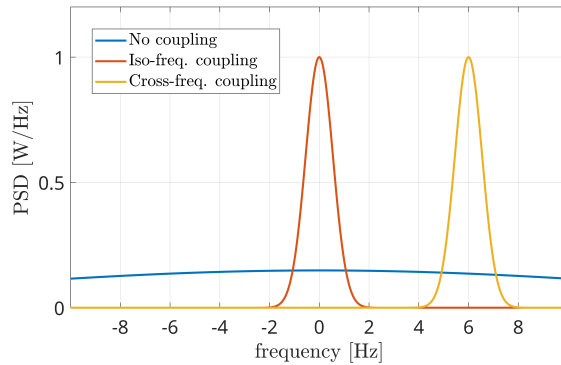

Figure 2: Power spectral densities of the interferometric components (i.e. the power spectrum of the phases of the interferometric signal) in three different conditions: independent sources (blue line), coupled iso-frequency sources (red line), coupled sources at different frequencies (yellow line). The presence of a power peak denotes the coupling between sources, while its position indicates the difference in their resonant frequencies.

small, resulting in a peak centered around  $f = 0$ . In this case, the last step for measuring connectivity strength consists in computing the percentage of power within a narrow band  $[-B, B]$  around  $f = 0$ :

$$PLM = \frac{\int_{-B}^B S_Z(f) df}{\int_{-\infty}^{\infty} S_Z(f) df}. \quad (5)$$

In [29] it has been shown that a  $B$  value of 1 Hz is a well balanced trade-off between the discrimination capability and the estimation noise of the algorithm. The PLM approach has shown a good performance in measuring the iso-frequency coupling, i.e. in distinguishing between the case of the blue line and the red line in Figure 2. Nevertheless, it has to be modified in order to make it effective in analyzing the last case, the cross-frequency coupling.

### 150 2.3. Cross-frequency PLM

In the CFC condition, a non-minimal frequency difference  $\Delta f$  occurs between the coupled components of the sources, and such difference produces a shift in the interferometric spectrum, as shown by the yellow curve of Figure 2. In this case, the coupling is evident due to the presence of the peak, which

155 is now centered at  $f = \Delta f$  (6 Hz in the reported case) instead of  $f = 0$ . This difference makes the PLM (Eq. (5)) unable to capture the coupling, as the power is no longer concentrated in the  $[-B, B]$  band. One should notice that the knowledge of the frequency difference  $\Delta f$  would solve the problem, as the integration could be shifted accordingly into the  $[\Delta f - B, \Delta f + B]$  frequency  
160 range. However, this kind of *a priori* knowledge is not available at all times, as it is often the case in resting-state as well as in many task-related settings. This situation can be handled by looking for maxima (i.e. power peaks) in the interferometric power spectrum  $S_Z(f)$ . Once a local maximum is identified (besides the one centered in 0), its power and position can be easily measured.  
165 This is what the proposed methodology implements. In other words, once the PSD function of Eq. (3) is computed, the global maximum is identified. By retrieving its position, the difference between the two sources central frequencies  $\Delta f$  is identified. Subsequently, the coupling strength is measured by adapting the upper integral of Eq. (5), i.e.:

$$\text{CF-PLM} = \frac{\int_{\Delta f - B}^{\Delta f + B} S_Z(f) df}{\int_{-\infty}^{\infty} S_Z(f) df}. \quad (6)$$

170 However, the provided information concerns the frequency difference between the two sources, the central frequencies of the coupled components still have to be determined. Hence, the last step is to identify the oscillation frequencies of the two components involved in the CFC. To this aim, a band-stop Gaussian-shaped frequency filter has been adopted. The stop band is centered  
175 at  $f_H$  and is  $2B$  large. The central frequency  $f_H$  is moved in order to scan the whole frequency range of the acquired signals, e.g. the  $[0.5, 48]$  Hz range, as reported in Figure 3 (top). Let us focus on the signal of the first source (i.e.  $x(t)$  of Eq. (1)). Once the filter is overlapped to frequency components involved in the coupling and removes them, the peak of the interferometric PSD  $S_Z(f)$   
180 disappears, as shown in Figure 3 (center). The filter position  $f_H$  will reveal the frequency  $f_x$  of  $x(t)$  involved in the coupling. The same process is repeated for the second source  $y(t)$  for the identification of  $f_y$ , according to Figure 3 (bottom). After the frequency scans, the two central frequencies of the components

involved in the CFC  $f_x$  and  $f_y$  are identified, while the amount of coupling is  
185 related to the peak energy and is measured via Eq. (6).

### 3. Results

The proposed methodology has been tested on both synthetic and real  
datasets. In case of simulated data, two approaches have been adopted for  
190 generating the cross-frequency coupled signals, exploiting Rössler attractors  
and Kuramoto oscillators, respectively. In more detail, the sensibility of the  
CF-PLM metrics to coupling strength has been analyzed by means of Rössler  
attractors signals to which a frequency shift has been applied. Furthermore, a  
modified version of the Kuramoto oscillators implementing signals with differ-  
195 ent central frequencies has been considered, in order to test the ability of the  
CF-PLM to identify the two frequencies involved in the coupling. As a third  
analysis, real data acquisitions have been considered for the final validation of  
the approach.

#### 3.1. Rössler attractors

200 Two time series have been generated according to the model [35]:

$$\begin{aligned}\dot{x}_{1,2} &= -2\pi f_{1,2}y_{1,2} - z_{1,2} + \xi_{1,2} + c(x_{2,1} - x_{1,2}) \\ \dot{y}_{1,2} &= 2\pi f_{1,2}x_{1,2} + 0.15y_{1,2} \\ \dot{z}_{1,2} &= 0.2 + z_{1,2}(x_{1,2} - 10)\end{aligned}\tag{7}$$

with coupling strength  $c$  varying between 0 and 0.04. A resonance frequency  
 $f_1$  equal to 10 Hz has been chosen, while the duration and the sampling interval  
have been set equal to 625 Hz and 420 s, respectively. The two coupled time  
series  $x(t)$  and  $y(t)$  have been generated with a central frequency  $f_1$ . Subse-  
205 quently, the cross-frequency has been simulated by applying a frequency shift to  
the second attractor  $y(t)$  via the modulation property of the Fourier transform:

$$y_{\Delta f}(t) = y(t)e^{-i2\pi\Delta f t}.\tag{8}$$

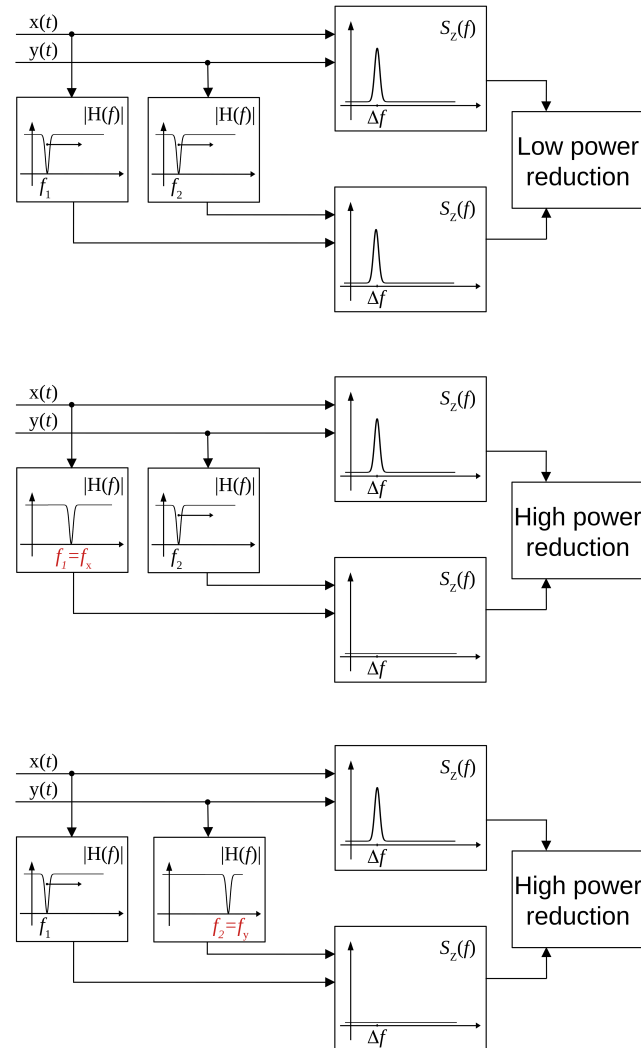

Figure 3: Scheme of the procedure for the identification of frequencies involved in the coupling. When the frequency stop filters are not overlapped to the frequencies involved in the coupling, the peak in the interferometric PSD is present (top). When one filter overlaps with the frequency of the first (center) or the second source (bottom), the peak disappears and there is a reduction in the power.

For this analysis, we considered  $\Delta f = 7$  Hz. The CF-PLM has been computed between  $x(t)$  and  $y_{\Delta f}(t)$ . Several analyses have been conducted aiming at evaluating the sensitivity of the proposed metrics with respect to the coupling strength of the attractors, the SNR and the frequency shift. In Figure 4, the values measured by the CF-PLM as a function of attractor's coupling strength are reported in case of different SNR levels (using white, additive noise). In more detail, a Monte Carlo simulation with 50 iterations has been implemented and the mean values are reported. As expected, the CF-PLM value increases as a function of the coupling strength, for each of the considered noise levels. Moreover, we tested the CF-PLM in case of several frequency shifts, obtaining the same curves reported in Figure 4.

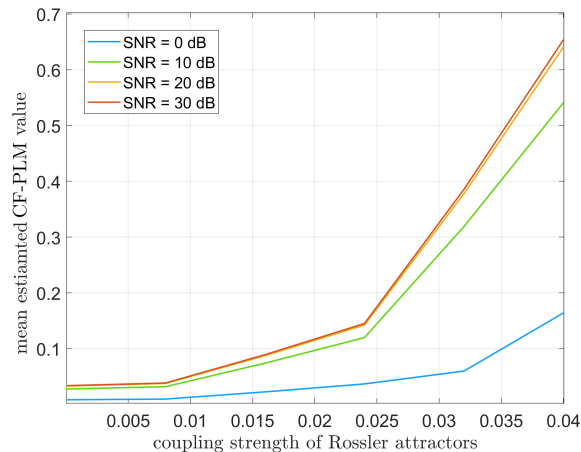

Figure 4: Mean values of CF-PLM measured in case of two Rössler oscillators varying their coupling strength from 0 (no coupling) to 0.04 (high coupling). Results are reported in case of different SNR values between 0 dB and 30 dB.

### 3.2. Kuramoto oscillators

Three mutually coupled Kuramoto oscillators, namely  $s_1(t)$ ,  $s_2(t)$  and  $s_3(t)$ , have been generated according to the following model [36]:

$$\frac{d\theta_n}{dt} = 2\pi f_n + k \sum_{p=1}^3 C \sin(\theta_p(t - \tau) - \theta_n(t)) \quad (9)$$



with  $n = 1, 2, 3$ ,  $\tau = 0.6$  s and  $C = 1$ . The central frequencies have been set equal to 10 Hz, 10 Hz and 17 Hz, respectively. The first oscillator ( $s_1(t)$ ,  $f = 10$  Hz) has been compared to the second one ( $s_2(t)$ ,  $f = 10$  Hz), to the third one ( $s_3(t)$ ,  $f = 17$  Hz) and to the sum of the last two ( $s_2(t) + s_3(t)$ ,  $f = 10$  Hz and 17 Hz). The three PSDs of the interferometric signals  $S_Z(f)$  are reported in Figure 5. It is evident that iso-frequency synchronization is correctly measured in the case of two 10 Hz oscillators (the power peak centered at 0 Hz of Figure 5a), as well as the cross-frequency synchronization occurring between  $s_1(t)$  and  $s_3(t)$  (the power peak centered around -7 Hz of Figure 5b). Importantly, the case of multiple components simultaneously synchronized in iso and cross-frequency is correctly handled, with the two power peaks positioned at 0 Hz and -7 Hz in Figure 5c.

Since the Kuramoto oscillators are coupled with a time delay between them, the frequency shift depends not only on the natural frequencies of each oscillator but also on the coupling strength between them [37, 38]. In Figure 6 we show that the position of the interferometric peak is shifted as a function of the coupling strength, thus validating the existence of a cross-frequency interaction between the oscillators. In other words, this shows that the presence of synchrony, at the frequency that is predicted theoretically, is captured by the metric (as opposed to merely be capturing n:m phase relationships, whose frequencies are not expected to be dependent from the coupling strength).

Let us now analyze how the frequencies involved in the connectivity process are identified. According to the processing scheme previously described and reported in Figure 3, two stop-band filters are implemented in the frequency domain. The peak power reduction is computed when moving the central frequencies of these filters within the [0, 20] Hz range. Results are reported in Figure 7 for all the considered cases. When the filter removes from the first signal the frequencies involved in the coupling, a power reduction is measured in the PSD peak. As a consequence, a horizontal dark line will appear in the images of Figure 7. Analogously, a vertical line will appear when the corresponding frequency of the second source is removed. The result is a cross-shaped image,

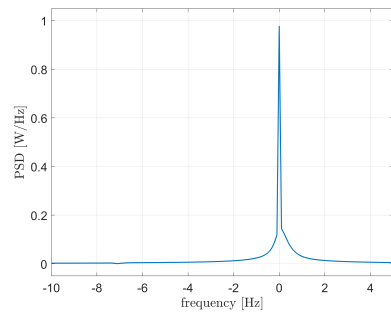

(a)  $|S_{Z,I}(f)|$ , iso-freq. coupling.

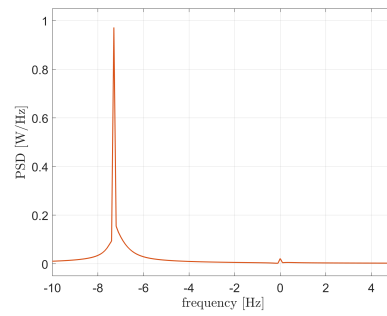

(b)  $|S_{Z,C}(f)|$ , cross-freq coupling.

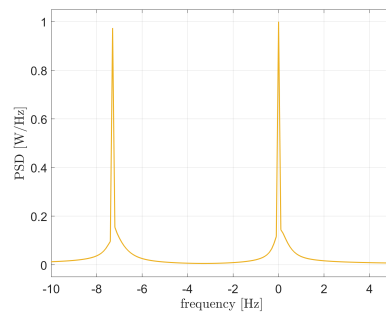

(c)  $|S_{Z,IC}(f)|$ , iso-freq and cross-freq. coupling.

Figure 5: Power spectra of the interferometric signals in case of coupled Kuramoto oscillators: iso-frequency (a), cross-frequency (b), iso and cross-frequency (c).

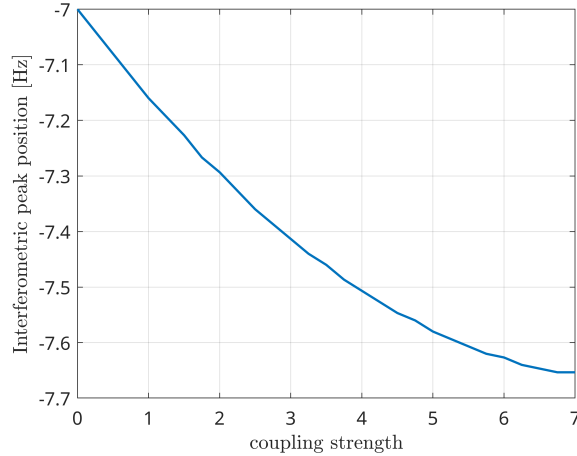

Figure 6: Position of the interferometric peak while varying the global coupling strength of two Kuramoto oscillators.

with the center identifying the two frequencies involved in the coupling. By looking at Figure 7, it is evident that the maximum power reduction appears at (10, 10) Hz in the case of  $s_1(t)$ ,  $s_2(t)$  coupling, at (10, 17) Hz in the case of  $s_1(t)$ ,  $s_3(t)$  coupling, while in the simultaneous iso and cross-frequency coupling two couples are correctly identified at (10, 10) Hz and (10, 17) Hz, respectively. All these results are in accordance with what we expected, as the procedure correctly estimates both the connectivity strength and the oscillator frequencies involved in the coupling from the interferometric spectrum.

In order to have a benchmark, the dual-frequency coherence (DFC) [39], which is a normalized version of the second order bispectrum [40], has been implemented. Given the two acquired signals  $x(t)$  and  $y(t)$  and their Fourier transform  $X(\omega)$  and  $Y(\omega)$ , the DFC is defined as:

$$DCF(\omega_1, \omega_2) = \frac{|X(\omega_1)Y'(\omega_2)|^2}{[X(\omega_1)X'(\omega_1)][Y(\omega_2)Y'(\omega_2)]}, \quad (10)$$

We computed the DFC for  $\omega_1$  and  $\omega_2$  in the [1, 20] Hz range in case of the CFC Kuramoto oscillators, obtaining the result reported in Figure 8. Compared to Figure 7b, it is evident that the metrics is less effective in determining the frequencies involved in the coupling as two maxima are present at a distance of

about 1 Hz.

### 3.3. Real data

#### 270 3.3.1. Acquisition and preprocessing

The acquisitions used for the analysis are from healthy subjects acquired at the MEG facility in Naples. The detailed procedure used for the processing of the acquisitions has been described in [41].

In brief, subjects were seated in a 163-magnetometers MEG system placed  
275 in a magnetically shielded room (AtB Biomag UG - Ulm - Germany). The brain activity was recorded twice for 3.5 minutes, with a small break to minimize the chances of drowsiness. After the anti-aliasing filter, the data were sampled at 1024 Hz, and filtered between 0.5 and 48 Hz with a 4<sup>th</sup> order Butterworth IIR band-pass filter [42]. During the acquisitions, the electrocardiogram (ECG) and  
280 the electrooculogram (EOG) were also recorded [43]. Principal component analysis (PCA) was used to reduce the environmental noise [44, 42]. Subsequently, noisy channels were removed manually through visual inspection by trained experts. For each subject, supervised independent component analysis (ICA) [45] was performed to eliminate the ECG and, if present, the EOG components from  
285 the MEG signals. MEG data were then co-registered to the native MRI of the subjects. We used the volume conduction model proposed by Nolte [46] and the linearly constrained minimum variance (LCMV) beamformer [47] to reconstruct the time-series related to the centroids of 90 regions-of-interest (ROIs), derived from the automated anatomical labeling (AAL) atlas [48, 49, 50]. For each  
290 source, we projected the time series along the dipole direction explaining most variance by means of singular value decomposition (SVD), obtaining a scalar value per each source.

#### 3.3.2. Connectivity measurement

The power spectra of the interferometric signal for each couple among the  
295 90 sources have been computed.

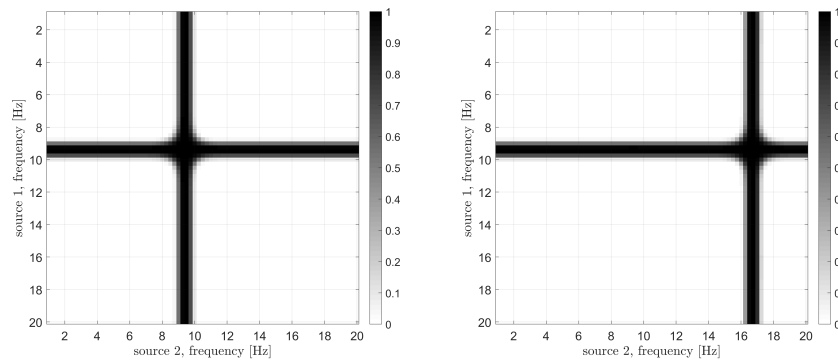

(a) IFC.

(b) CFC.

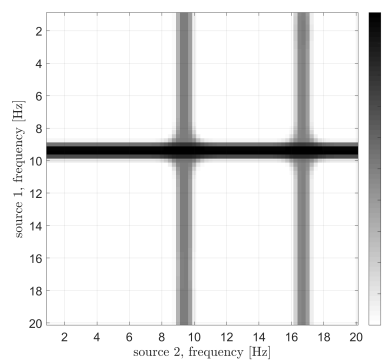

(c) IFC and CFC.

Figure 7: Results of the analysis for the identification of frequencies involved in the coupling in case of different Kuramoto oscillators: iso-frequency (a), cross-frequency (b), and simultaneous iso- and cross- frequency (c). The center of each cross identifies the frequencies of the two oscillators

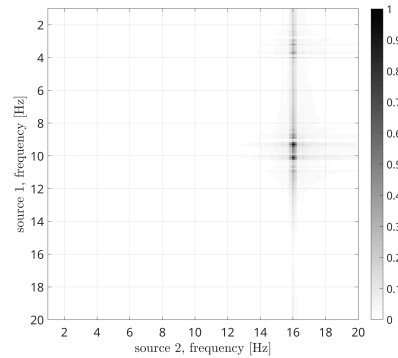

Figure 8: Dual-frequency coherence results in case of CFC Kuramoto oscillators.

In the following, we selected two couples of regions, i.e. the couple with the highest CFC peak (among all couples of regions), and a region with an average CFC peak intensity. To show that a high CFC peak is unlikely to appear by chance, we have validated the analysis against surrogates. Hence, the intensity of the highest CFC peak, derived from 10000 random surrogates, obtained by shuffling the phase of the signal in the frequency domain, have been computed. In Figure 13 (a), we show that, in the case of the high observed cross-frequency peak, the peak intensity was above the 99th percentile of the surrogates. On the contrary, in case of the average CFC peak (Figure 13 (b)), its intensity was around the 50th percentile, as expected.

To further check the validity of our analysis in real subjects, we went on to estimate the anatomical consistency of the CFC peaks per each link across subjects. To do so, we proceeded as follows: for each of 4 subjects, for each source pair the intensity of the strongest CFC peak has been measured ( $|\Delta f| \geq 2$  Hz). Subsequently, we binarized the CFC peak matrix according to a threshold. To avoid a dependency of the result from the choice of the threshold, we have repeated the analysis across a range of thresholds, i.e. from the 1st to the 99th percentile. Then, we have summed across the binary matrices obtaining one matrix per subject which does not depend on any specific threshold (Fig.

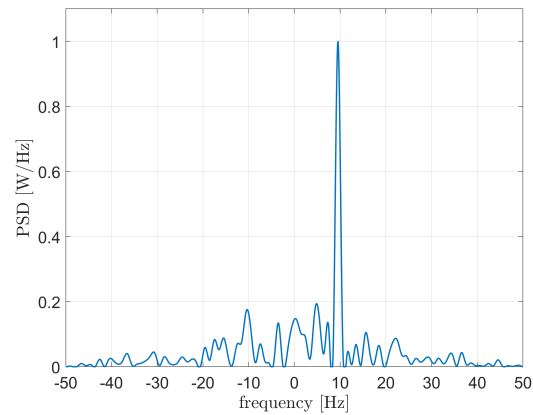

(a) Interferometric PSD

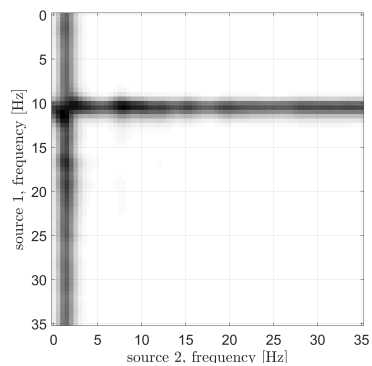

(b) Freq. id. - CFC-PLM

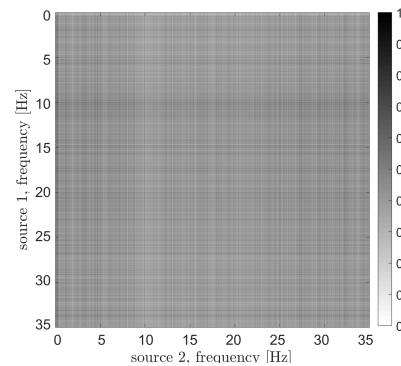

(c) Freq. id. - DFC

Figure 9: Analysis of signals from areas 57 (right inferior parietal lobule) and 42 (orbital part of the right superior frontal gyrus). (a) PSD of the interferometric signal. The peak related to the cross-frequency coupling, located at +9.5 Hz is clearly visible. (b) Frequencies identification via CFC-PLM. The frequencies involved are  $f_1 = 11$  (for source 57) and  $f_2 = 1.5$  (for source 42). (c) Frequencies identification via Dual-Frequency Coherence. Although a dark area in case of  $f_1 = 10$  Hz is visible, the two frequencies cannot be identified.

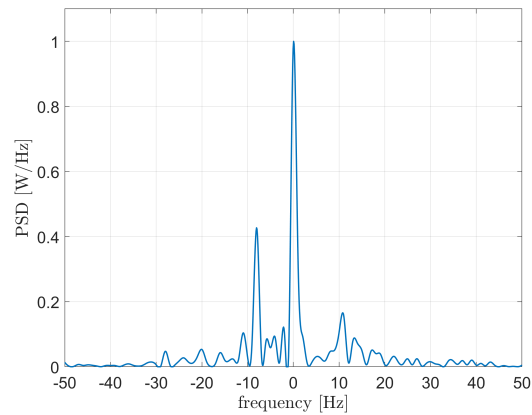

(a) Interferometric PSD

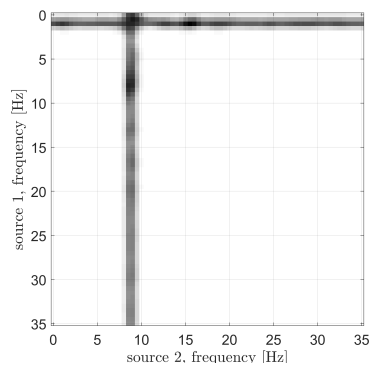

(b) Freq. id. - CFC-PLM

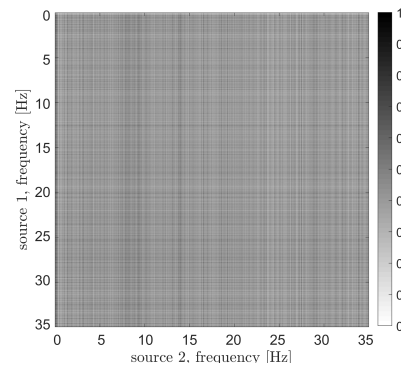

(c) Freq. id. - DFC

Figure 10: Analysis of signals from areas 7 (left superior frontal gyrus) and 25 (left calcarine sulcus). (a) PSD of the interferometric signal. Two main peaks are visible, located at 0 Hz (related to the iso-frequency coupling) and -8 Hz (related to the cross-frequency coupling). (b) Frequencies identification via CFC-PLM. The frequencies involved are  $f_1 = 1$  (for source 7) and  $f_2 = 9$  (for source 25). (c) Frequencies identification via Dual-Frequency Coherence. A global maximum is not visible, and thus the two involved frequencies cannot be identified.



315 13, a-d). Finally, the subject specific matrices were summed, showing that the presence of a CFC peak is topographically consistent across individuals (fig.13, e). In Figure 11 panel A, the source couples that are beyond a high number of thresholds, i.e. high percentile values, are reported in progressively intense red. The most evident points of this connectivity matrix are those related to  
320 the strongest CFC peaks. In panel B, the delta-frequencies corresponding to the significant edges are reported. Finally, in panel C, the regional sum of the peak intensity is reported.

Now we are going to focus on the couple of regions with the highest CFC peak. In Figure 9a, the PSD of the interferometric signal related to the right  
325 inferior parietal lobule and the orbital part of the right superior frontal gyrus are reported. Results are related to one epoch about 150 seconds long of a single subject. A power peak positioned at 9.5 Hz is clearly visible, which shows the presence of cross-frequency coupling. In the following step the sources frequencies involved in the coupling are determined. As explained earlier, the  
330 procedure consists in filtering the two signals and measuring the power reduction of the frequency peak. In Figure 9b, it is evident that the highest reduction is found in case of  $f_1 \approx 11$  Hz and of  $f_2 \approx 1.5$  Hz. The result obtained by the DCF, which is reported in Figure 9c, is not effective in identifying the involved frequencies, as the global maximum is hardly distinguishable.

335 A second pair of brain regions has been considered, namely the left superior frontal gyrus and the left calcarine sulcus. The PSD of the interferometric signal is reported in Figure 10a. Two peaks are evident in this case, one centered in zero, related to the iso-frequency coupling, and another one at -8 Hz, which denotes a cross-frequency connectivity. By focusing on the latter, the identified  
340 involved frequencies are reported in Figure 10b, and are around 1 Hz and 9 Hz. Also in this case, results are more convincing than the DCF (Figure 10c), which cannot be exploited for the frequency identification.

## 4. Discussion

345 In this paper, we present a novel phase-based metrics capturing the occurrence of cross-frequency synchronization in the resting-state brain. The main advance of this work lies in the fact that the proposed procedure detects cross-frequency synchronization reliably, without a priori hypothesis about the frequencies of the synchronized components.

350 It is important to notice that such a procedure lands itself nicely to study if and where cross-frequency synchronization is occurring in resting-state, when no specific task is taking place, and hence no hypothesis about the frequencies of CFC is available. Furthermore, this procedure only captures phase synchronization, since the amplitude does not affect the estimate [5]. This is of particular  
355 relevance, provided that a number of mechanisms are believed to operate simultaneously in the brain in order to allow communication between neuronal populations operating at different frequencies [4], but n:m synchronization is the only neuronal mechanism by which two neuronal population can influence each other at the temporal accuracy of the fast-operating neuronal population  
360 [22, 8]. Hence, the results provided by our procedure are interpreted in terms of a defined neurophysiological mechanism (i.e. n:m synchronization), and are very noise-resilient while being entirely independent from the amplitude of the signals. The detection of cross-frequency coupling is specifically relevant taking into account the phenomenon of frequency mixing, i.e. the appearance of new  
365 frequencies in neuronal circuitry when incoming oscillations are non-linearly integrated [51].

### 4.1. Rössler attractors

Firstly, we simulated synthetic data by using two Rössler attractors, as they retain non-linear properties that are similar to the ones displayed by real  
370 M/EEG data [52]. In order to simulate CFC, we modified one of the two attractors by applying a frequency shift. Similarly to what is shown in our previous work presenting the PLM [29], one can appreciate that the peak in the inter-

ferometric spectrum grows monotonically as a function of the strength of syn-  
chronization between oscillators (regardless of their frequencies). Furthermore,  
375 one can appreciate that the interferometric spectrum peaks are at the frequency  
corresponding to the shift that had been introduced. Hence, the PSD allows the  
estimation of both the intensity of the synchronization as well as the difference  
between the frequencies of the involved signals. In addition, the resiliency to  
noise has been tested in this simulation, and a reliable estimate is possible also  
380 with realistic amount of noise.

#### 4.2. Kuramoto oscillators

When dealing with real M/EEG signals, the case is more complicated since  
each signal has a very rich frequency spectrum, where the simultaneous presence  
of multiple components synchronizing in iso- and cross- frequency occurs. We  
385 used a model based on Kuramoto oscillators to explore if the CF-PLM can  
disentangle these different contributions.

Firstly, we explored the simple synchronization between two oscillators syn-  
chronized in iso-frequency (10 Hz-10 Hz). As shown by the peak centered in 0  
in figure 5a, the synchronization is correctly captured as expected. Then, we  
390 explored the case of cross-frequency synchronization of Kuramoto oscillators.  
The interferometric spectrum displays one peak in correspondence to the fre-  
quency difference of the two oscillators (at -7 Hz in the example in 5b, since the  
two originating signals are oscillating at 10 Hz and 17 Hz, respectively). In the  
third case, one oscillator at 10 Hz has been compared to the sum of two more  
395 oscillators at 10 Hz and 17 Hz. This simulation is intended to create a single sig-  
nal where some specific components are synchronized in iso-frequencies, while  
different ones are synchronized in cross-frequency. As expected, the compo-  
nents in iso-frequency produced a peak at 0 Hz in the interferometric spectrum,  
while a second peak appears at -7 Hz, capturing the cross-frequency synchro-  
400 nization. Such results show that the proposed methodology can disentangle the  
cases where multiple components are synchronized simultaneously in iso- and  
cross-frequency. Similarly to the previous scheme, we have then explored the

resiliency of this estimate to the presence of noise. We show, also in this case, that our metrics produces a noise-resilient estimate of synchronization (despite  
405 being based solely on the phase).

Results reported in Figure 7 show that the proposed approach effectively estimates the frequencies involved in the coupling, both iso-frequency (Figure 7(a)), cross-frequency (Figure 7(b)) and simultaneous iso and cross-frequency (Figure 7(c)). More in details, the centers of all the computed crosses are  
410 correctly positioned and allow the identification of the frequency components present in the oscillators and involved in the coupling process.

#### 4.3. Real Data

The analysis with the real data is intended to show that such a cross-frequency-coupling is happening in resting state, and can be captured by the  
415 proposed procedure. Each interferometric peak has been statistically validated against surrogates, making it unlikely that it would occur by chance. Furthermore, if the peaks were occurring by chance, one would expect that no consistent patterns of cross-frequency coupling in different subjects. However, observing the CFC analysis, one can appreciate the cross-frequency-coupling is not a  
420 widespread phenomenon happening in any area, but, rather, specific to some areas. More in detail, Figure 11, left column, clearly shows that the strongest cross-frequency connections do not spread randomly across the matrix, and a texture appears, indicating that a specific CFC network is operating involving specific edges, rather than being randomly spread across the brain, as one would  
425 expected for a random phenomenon. Besides this coherent spatial distribution, images in the right column of Figure 11 show that also the frequency components that are correlated are not random, but a pattern emerges. Finally, Figure 12 helps the visualization of the regions where cross frequency coupling occurs consistently. While a systematic description of these patterns goes beyond the  
430 scope of the current paper, one should notice that temporo-parietal regions as well as occipital ones, appear symmetrically involved in cross-frequency communication. Roughly speaking, these regions are involved in perceptive streams

processing external stimuli. Importantly, as the ground truth is ultimately unknown, one should be very cautious at making inference.

435 However, one good aspect of the proposed procedure lies in the fact that a form of “double-check” is possible. In fact, once the frequency on the peak of the interferometric spectrum is known, and the related component in signal A has been identified, one has already a hypothesis about the frequency of the synchronized component in signal B. Hence, if the procedure is consistent, 440 the filtering of signal B should confirm this hypothesis. In fact, as explained previously, the peak of the interferometric signal appears at a frequency equal to the difference of frequencies between the two components. In conclusion, with the proposed procedure we are able to determine the central frequencies of signals A and B involved in the coupling. We made a number of tests to explore 445 the behaviour of the proposed procedure to different lengths of acquisitions and different number of epochs, confirming that this procedure is robust also with little and/or noisy data. One aspect of interest is that our metrics does not need the data to be split into trials, hence taking advantage of the full length of the available data. However, even when only short or limited data segments 450 are available, the new procedure can still retrieve reliable results.

## 5. Conclusions

In this manuscript, we propose a new metric that can estimate cross-frequency coupling from broad-band signals with no a priori hypothesis on what the information transfers would be. Since cross-frequency coupling is the only neuronal 455 mechanism that can allow fast communication between neuronal ensemble operating at different frequencies, we believe our metric can help to study the mechanisms of cross-frequency communication in the resting-state, as well as its topography and topology.

## References

- 460 [1] S. L. Bressler, Large-scale cortical networks and cognition., *Brain research. Brain research reviews* 20 (3) (1995) 288–304.
- [2] K. J. Friston, Functional and effective connectivity in neuroimaging: A synthesis, *Human Brain Mapping* 2 (1-2) (1994) 56–78. doi:10.1002/hbm.460020107.
- 465 [3] G. Buzsáki, A. Draguhn, Neuronal Oscillations in Cortical Networks, *Science* 304 (5679).
- [4] O. Jensen, L. L. Colgin, Cross-frequency coupling between neuronal oscillations, *Trends in Cognitive Sciences* 11 (7) (2007) 267–269. doi:10.1016/j.tics.2007.05.003.
- 470 [5] P. Tass, M. G. Rosenblum, J. Weule, J. Kurths, A. Pikovsky, J. Volkmann, A. Schnitzler, H.-J. Freund, Detection of  $n : m$  Phase Locking from Noisy Data: Application to Magnetoencephalography, *Physical Review Letters* 81 (15) (1998) 3291–3294. doi:10.1103/PhysRevLett.81.3291.
- [6] R. T. Canolty, E. Edwards, S. S. Dalal, M. Soltani, S. S. Nagarajan, H. E. Kirsch, M. S. Berger, N. M. Barbaro, R. T. Knight, High Gamma Power Is Phase-Locked to Theta Oscillations in Human Neocortex NIH Public Access, *Science* 313 (5793) (2006) 1626–1628. doi:10.1126/science.1128115.
- 475 [7] A. K. Engel, C. Gerloff, C. C. Hilgetag, G. Nolte, Review Intrinsic Coupling Modes : Multiscale Interactions in Ongoing Brain Activity, *Neuron* 80 (4) (2013) 867–886. doi:10.1016/j.neuron.2013.09.038.
- 480 [8] M. Le Van Quyen, A. Bragin, Analysis of dynamic brain oscillations: methodological advances, *Trends in Neurosciences* 30 (7) (2007) 365–373. doi:10.1016/J.TINS.2007.05.006.

- 485 [9] A. B. L. Tort, R. Komorowski, H. Eichenbaum, N. Kopell, Measuring Phase-Amplitude Coupling Between Neuronal Oscillations of Different Frequencies, *Journal of Neurophysiology* 104 (2) (2010) 1195–1210. doi:10.1152/jn.00106.2010.
- [10] R. T. Canolty, R. T. Knight, The functional role of cross-frequency coupling, *Trends Cogn Sci* 14 (11) (2010) 506–515. doi:10.1016/j.tics.2010.09.001.  
490
- [11] F. Varela, J.-P. Lachaux, E. Rodriguez, J. Martinerie, The brainweb: Phase synchronization and large-scale integration, *Nature Reviews Neuroscience* 2 (4) (2001) 229–239. doi:10.1038/35067550.
- 495 [12] V. Jirsa, V. Müller, Cross-frequency coupling in real and virtual brain networks, *Frontiers in Computational Neuroscience* 7 (2013) 78. doi:10.3389/fncom.2013.00078.
- [13] A. B. L. Tort, R. W. Komorowski, J. R. Manns, N. J. Kopell, H. Eichenbaum, Theta-gamma coupling increases during the learning of item-context associations, *Proceedings of the National Academy of Sciences* 106 (49) 500 (2009) 20942–20947. doi:10.1073/pnas.0911331106.
- [14] K. M. Kendrick, Y. Zhan, H. Fischer, A. U. Nicol, X. Zhang, J. Feng, Learning alters theta amplitude, theta-gamma coupling and neuronal synchronization in inferotemporal cortex, *BMC Neuroscience* 12 (1) (2011) 55. 505 doi:10.1186/1471-2202-12-55.
- [15] B. Schack, S. Weiss, Quantification of phase synchronization phenomena and their importance for verbal memory processes, *Biological Cybernetics* 92 (4) (2005) 275–287. doi:10.1007/s00422-005-0555-1.
- 510 [16] L. L. Colgin, T. Denninger, M. Fyhn, T. Hafting, T. Bonnevie, O. Jensen, M.-B. Moser, E. I. Moser, Frequency of gamma oscillations routes flow of information in the hippocampus, *Nature* 462 (7271) (2009) 353–357. doi:10.1038/nature08573.

- [17] S. M. Doesburg, J. J. Green, J. J. McDonald, L. M. Ward, Rhythms of Consciousness: Binocular Rivalry Reveals Large-Scale Oscillatory Network Dynamics Mediating Visual Perception, *PLoS ONE* 4 (7) (2009) e6142. doi:10.1371/journal.pone.0006142.
- [18] F. Siebenhühner, S. H. Wang, J. M. Palva, S. Palva, Cross-frequency synchronization connects networks of fast and slow oscillations during visual working memory maintenance, *eLife* 5. doi:10.7554/eLife.13451.
- [19] M. X. Cohen, C. E. Elger, J. Fell, Oscillatory Activity and PhaseAmplitude Coupling in the Human Medial Frontal Cortex during Decision Making, *Journal of Cognitive Neuroscience* 21 (2) (2009) 390–402. doi:10.1162/jocn.2008.21020.
- [20] R. A. Seymour, G. Rippon, K. Kessler, The Detection of Phase Amplitude Coupling during Sensory Processing, *Frontiers in Neuroscience* 11 (2017) 487. doi:10.3389/fnins.2017.00487.
- [21] S. Vanhatalo, J. M. Palva, M. D. Holmes, J. W. Miller, J. Voipio, K. Kaila, Infraslow oscillations modulate excitability and interictal epileptic activity in the human cortex during sleep, *Proceedings of the National Academy of Sciences* 101 (14) (2004) 5053–5057. doi:10.1073/pnas.0305375101.
- [22] J. M. Palva, S. Palva, K. Kaila, Phase Synchrony among Neuronal Oscillations in the Human Cortex, *Journal of Neuroscience* 25 (15) (2005) 3962–3972. doi:10.1523/JNEUROSCI.4250-04.2005.
- [23] V. Nikulin, T. Brismar, Phase synchronization between alpha and beta oscillations in the human electroencephalogram, *Neuroscience* 137 (2) (2006) 647–657. doi:10.1016/j.neuroscience.2005.10.031.
- [24] J. Fell, N. Axmacher, The role of phase synchronization in memory processes, *Nature Reviews Neuroscience* 12 (2) (2011) 105–118. doi:10.1038/nrn2979.



- 540 [25] J. C. Sigl, N. G. Chamoun, An introduction to bispectral analysis for the  
electroencephalogram, *Journal of Clinical Monitoring* 10 (6) (1994) 392–  
404. doi:10.1007/BF01618421.
- [26] F. Darvas, J. G. Ojemann, L. B. Sorensen, Bi-phase locking-a tool for prob-  
ing non-linear interaction in the human brain doi:10.1016/j.neuroimage.  
545 2009.01.034.
- [27] M. X. Cohen, Assessing transient cross-frequency coupling in EEG data.,  
*Journal of neuroscience methods* 168 (2) (2008) 494–9. doi:10.1016/j.  
jneumeth.2007.10.012.
- [28] J. Cabral, H. Luckhoo, M. Woolrich, M. Joensuu, H. Mohseni, A. Baker,  
550 M. L. Kringelbach, G. Deco, Exploring mechanisms of spontaneous func-  
tional connectivity in MEG: How delayed network interactions lead to  
structured amplitude envelopes of band-pass filtered oscillations, *NeuroIm-  
age* 90 (2014) 423–435. doi:10.1016/j.neuroimage.2013.11.047.
- [29] F. Baselice, A. Sorriso, R. Rucco, P. Sorrentino, Phase Linearity Measure-  
555 ment: A Novel Index for Brain Functional Connectivity, *IEEE Transac-  
tions on Medical Imaging* 38 (4) (2019) 873–882. doi:10.1109/TMI.2018.  
2873423.
- [30] P. Sauseng, W. Klimesch, K. F. Heise, W. R. Gruber, E. Holz, A. A.  
Karim, M. Glennon, C. Gerloff, N. Birbaumer, F. C. Hummel, Brain Oscil-  
560 latory Substrates of Visual Short-Term Memory Capacity, *Current Biology*  
19 (21) (2009) 1846–1852. doi:10.1016/j.cub.2009.08.062.
- [31] D. Volk, I. Dubinin, A. Myasnikova, B. Gutkin, V. V. Nikulin, Generalized  
Cross-Frequency Decomposition: A Method for the Extraction of Neuronal  
Components Coupled at Different Frequencies, *Frontiers in Neuroinformat-  
565 ics* 12 (2018) 72. doi:10.3389/fninf.2018.00072.
- [32] M. Yu, M. M. A. Engels, A. Hillebrand, E. C. W. van Straaten, A. A.  
Gouw, C. Teunissen, W. M. van der Flier, P. Scheltens, C. J. Stam, Selective

- impairment of hippocampus and posterior hub areas in Alzheimer's disease:  
an MEG-based multiplex network study, *Brain* 140 (5) (2017) 1466–1485.  
570 doi:10.1093/brain/awx050.
- [33] E. Niebur, H. G. Schuster, D. M. Kammen, Collective frequencies and  
metastability in networks of limit-cycle oscillators with time delay, *Physical  
Review Letters* 67 (20) (1991) 2753–2756. doi:10.1103/PhysRevLett.67.  
2753.
- 575 [34] F. Auger, P. Flandrin, Improving the readability of time-frequency and  
time-scale representations by the reassignment method, *IEEE Transactions  
on Signal Processing* 43 (5) (1995) 1068–1089. doi:10.1109/78.382394.
- [35] M. Rosenblum, A. Pikovsky, J. Kurths, C. Schfer, P. Tass, Chapter 9 phase  
synchronization: From theory to data analysis, in: F. Moss, S. Gielen  
580 (Eds.), *Neuro-Informatics and Neural Modelling*, Vol. 4 of *Handbook of  
Biological Physics*, North-Holland, 2001, pp. 279 – 321. doi:[https://  
doi.org/10.1016/S1383-8121\(01\)80012-9](https://doi.org/10.1016/S1383-8121(01)80012-9).
- [36] J. Cabral, E. Hugues, O. Sporns, G. Deco, Role of local network oscillations  
in resting-state functional connectivity, *NeuroImage* 57 (1) (2011) 130 –  
585 139. doi:<https://doi.org/10.1016/j.neuroimage.2011.04.010>.
- [37] E. Niebur, H. G. Schuster, D. M. Kammen, Collective frequencies and  
metastability in networks of limit-cycle oscillators with time delay, *Phys.  
Rev. Lett.* 67 (1991) 2753–2756.
- [38] M. Y. Choi, H. J. Kim, D. Kim, H. Hong, Synchronization in a system  
590 of globally coupled oscillators with time delay, *Phys. Rev. E* 61 (2000)  
371–381.
- [39] R. J. Mellors, F. L. Vernon, D. J. Thomson, Detection of dispersive signals  
using multitaper dual-frequency coherence, *Geophysical Journal Interna-  
tional* 135 (1) (1998) 146–154.

- 595 [40] D. J. Thomson, Spectrum estimation and harmonic analysis, *Proceedings of the IEEE* 70 (9) (1982) 1055–1096.
- [41] P. Sorrentino, R. Rucco, F. Jacini, F. Trojsi, A. Lardone, F. Baselice, C. Femiano, G. Santangelo, C. Granata, A. Vettoliere, M. R. Monsurrò, G. Tedeschi, G. Sorrentino, Brain functional networks become more connected as amyotrophic lateral sclerosis progresses: a source level magnetoencephalographic study, *NeuroImage: Clinical* 20 (2018) 564–571. doi:10.1016/j.nicl.2018.08.001.
- 600 [42] R. Oostenveld, P. Fries, E. Maris, J.-M. Schoffelen, FieldTrip: Open source software for advanced analysis of MEG, EEG, and invasive electrophysiological data., *Computational intelligence and neuroscience* 2011 (2011) 156869. doi:10.1155/2011/156869.
- [43] J. Gross, S. Baillet, G. R. Barnes, R. N. Henson, A. Hillebrand, O. Jensen, K. Jerbi, V. Litvak, B. Maess, R. Oostenveld, L. Parkkonen, J. R. Taylor, V. van Wassenhove, M. Wibral, J.-M. Schoffelen, Good practice for conducting and reporting MEG research., *NeuroImage* 65 (2013) 349–63. doi:10.1016/j.neuroimage.2012.10.001.
- 610 [44] N. D. Sadasivan, P K, SVD based technique for noise reduction in electroencephalographic signals, *Signal Processing* 55 (55) (1996) 179–189.
- [45] G. Barbati, C. Porcaro, F. Zappasodi, P. M. Rossini, F. Tecchio, Optimization of an independent component analysis approach for artifact identification and removal in magnetoencephalographic signals, *Clinical Neurophysiology* 115 (5) (2004) 1220–1232. doi:10.1016/j.clinph.2003.12.015.
- 615 [46] G. Nolte, The magnetic lead field theorem in the quasi-static approximation and its use for magnetoencephalography forward calculation in realistic volume conductors, *Physics in Medicine and Biology* 48 (22) (2003) 3637–3652. doi:10.1088/0031-9155/48/22/002.
- 620

- [47] B. D. Van Veen, W. Van Drongelen, M. Yuchtman, A. Suzuki, Localization of Brain Electrical Activity via Linearly Constrained Minimum Variance Spatial Filtering, *IEEE Transactions on Biomedical Engineering* 44 (9).
- 625 [48] G. Gong, Y. He, L. Concha, C. Lebel, D. W. Gross, A. C. Evans, C. Beaulieu, Mapping anatomical connectivity patterns of human cerebral cortex using in vivo diffusion tensor imaging tractography., *Cerebral cortex* (New York, N.Y. : 1991) 19 (3) (2009) 524–36. doi:10.1093/cercor/bhn102.
- 630 [49] N. Tzourio-Mazoyer, B. Landeau, D. Papathanassiou, F. Crivello, O. Etard, N. Delcroix, B. Mazoyer, M. Joliot, Automated anatomical labeling of activations in SPM using a macroscopic anatomical parcellation of the MNI MRI single-subject brain., *NeuroImage* 15 (1) (2002) 273–89. doi:10.1006/ning.2001.0978.
- 635 [50] A. Hillebrand, P. Tewarie, E. van Dellen, M. Yu, E. W. S. Carbo, L. Douw, A. A. Gouw, E. C. W. van Straaten, C. J. Stam, Direction of information flow in large-scale resting-state networks is frequency-dependent., *Proceedings of the National Academy of Sciences of the United States of America* 113 (14) (2016) 3867–72. doi:10.1073/pnas.1515657113.
- 640 [51] D. Hauffer, D. Paré, Detection of Multiway Gamma Coordination Reveals How Frequency Mixing Shapes Neural Dynamics, *Neuron* 101 (4) (2019) 603–614.e6. doi:10.1016/J.NEURON.2018.12.028.
- [52] M. G. Rosenblum, P. A. Tass, J. Kurths, Estimation of Synchronization from Noisy Data with Application to Human Brain Activity, Springer, Berlin, Heidelberg, 2000, pp. 202–211. doi:10.1007/3-540-45396-2\_20.
- 645

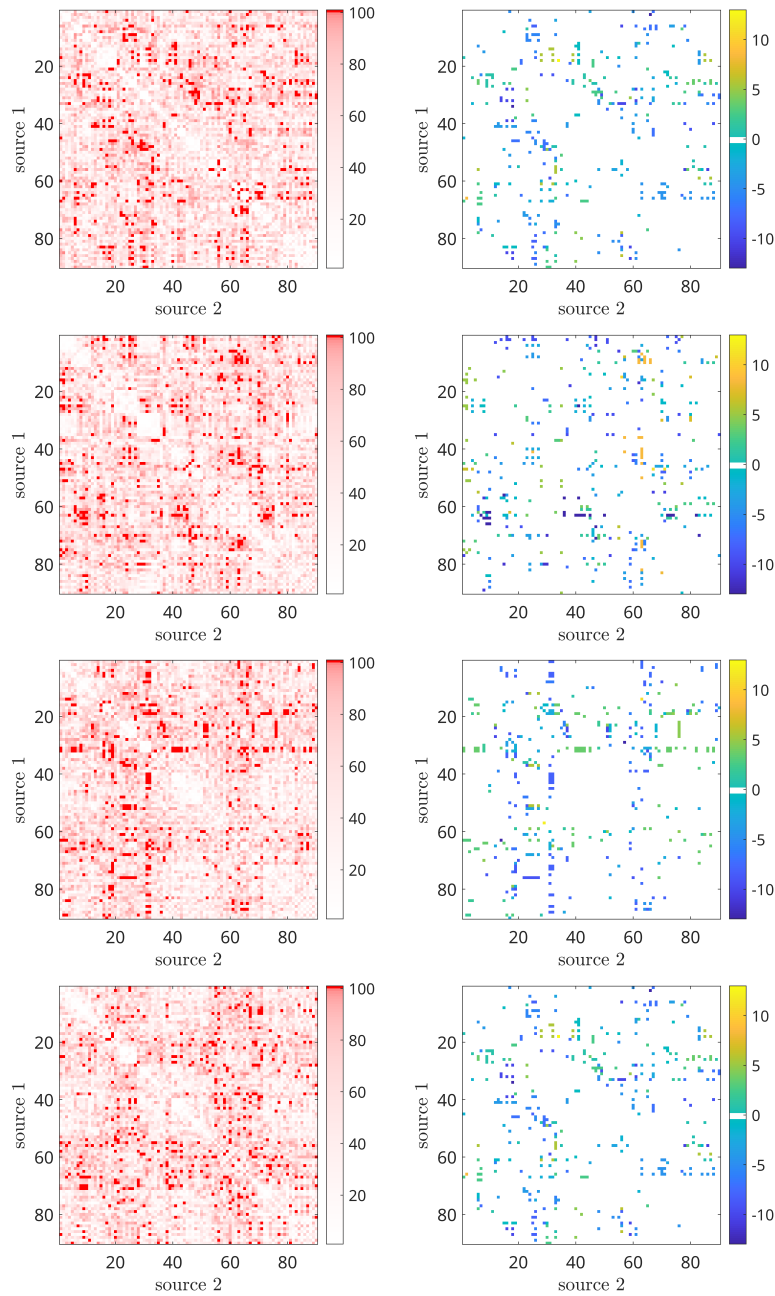

Figure 11: CFC matrix (left column: peak intensity, right column: peak frequency) of 4 subjects obtained by filtering the interferometric peaks intensity. The threshold values have been selected according to the percentiles of the distribution, spanning between 1 and 100. The most intense red points characterizes the CFC peaks with higher intensity.

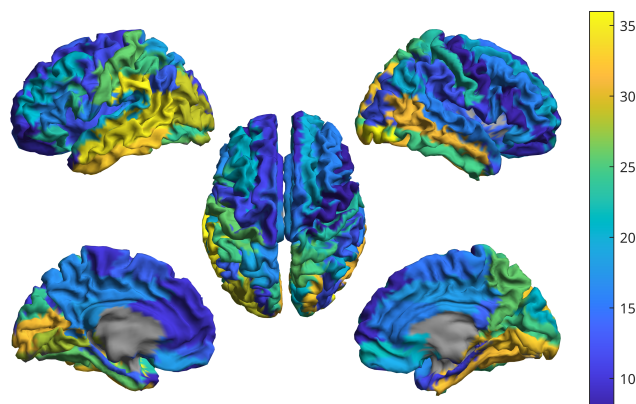

Figure 12: Brain regions where cross frequency coupling occurs consistently.

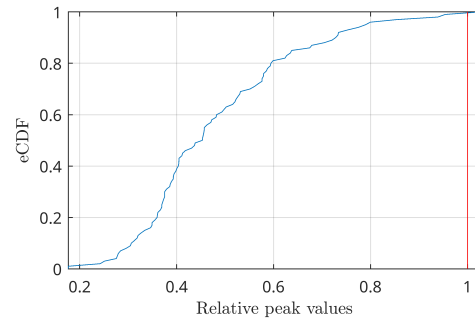

(a)

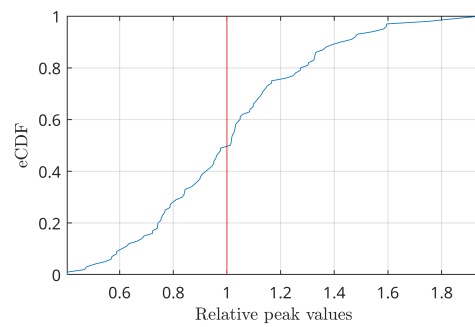

(b)

Figure 13: Empirical CDF of the peaks distributions obtained by shuffling the signal phases in the frequency domain (blue lines). Values have been normalized with respect to the highest CFC peak present in the data before shuffling (red line). The analysis refers to two cases: the highest CFC peak found among all couples of regions (a), where the peak intensity is above the 99% of the distribution, and a couple of regions with an average CFC peak intensity (b), where the peak is in the middle of the distribution.
